# Supplementary material
Source: ML conference proceedings conference paper supplement (https://openreview.net/forum?id=nFA8MWo9Ks)
Supplement: supplementary_material [file attachment]

# On Camera and LiDAR Positions in End-to-End Autonomous Driving (Supplementary Material)

Malte Stelzer<sup>1</sup>, Jan Pirklbauer<sup>1</sup>, Jan Bickerdt<sup>2</sup>, Volker P. Schomerus<sup>2</sup>,  
Jan Piewek<sup>2</sup>, Thorsten Bagdonat<sup>2</sup>, and Tim Fingscheidt<sup>1</sup>

<sup>1</sup> Technische Universität Braunschweig, Germany  
{malte.stelzer, jan.pirklbauer, t.fingscheidt}@tu-bs.de  
<sup>2</sup> Group Innovation Volkswagen AG, Germany  
{jan.bickerdt, volker.patricio.schomerus, jan.piewek,  
thorsten.bagdonat}@volkswagen.de

## A Statistical Calculations

This section provides a detailed insight into the calculations of the metrics and their corresponding statistical properties. Each run  $b \in \mathcal{B} = \{1, \dots, B\}$ ,  $B = 3$ , of the Longest6 Benchmark consists of  $n \in \mathcal{N} = \{1, 2, \dots, N\}$ ,  $N = 36$  routes<sup>3</sup>. For each run and route, the individual route completion  $\text{RC}_{b,n}$ , and infraction score  $\text{IS}_{b,n}$  are tracked, while the driving score  $\text{DS}_{b,n}$  is calculated as

$$\text{DS}_{b,n} = \text{RC}_{b,n} \cdot \text{IS}_{b,n}. \quad (1)$$

For each run  $b$ , the metrics are averaged as

$$\text{RC}_b = \frac{1}{N} \sum_{n \in \mathcal{N}} \text{RC}_{b,n}, \quad (2)$$

$$\text{IS}_b = \frac{1}{N} \sum_{n \in \mathcal{N}} \text{IS}_{b,n}, \quad (3)$$

$$\text{DS}_b = \frac{1}{N} \sum_{n \in \mathcal{N}} \text{DS}_{b,n}. \quad (4)$$

While  $\text{DS}_{b,n}$  is entangled with  $\text{RC}_{b,n}$  and  $\text{IS}_{b,n}$  on a route level (see (1)), the resulting  $\text{DS}_b$  is disentangled with  $\text{RC}_b$  and  $\text{IS}_b$  on a run level, since

$$\text{DS}_b = \frac{1}{N} \sum_{n \in \mathcal{N}} \text{DS}_{b,n} = \frac{1}{N} \sum_{n \in \mathcal{N}} \text{RC}_{b,n} \cdot \text{IS}_{b,n} \neq \text{RC}_b \cdot \text{IS}_b.$$

In the results reported in Table 1 of the main paper, the metrics are shown as average of  $B = 3$  benchmark runs with the respective sample standard deviation. To provide an example for DS, these are calculated as

$$\text{DS} = \frac{1}{B} \sum_{b \in \mathcal{B}} \text{DS}_b \quad (5)$$

<sup>3</sup> For simplicity, the term *routes* is used instead of *route-based scenarios*.

and

$$s(\text{DS}_b) = \sqrt{\frac{1}{B-1} \sum_{b \in \mathcal{B}} (\text{DS} - \text{DS}_b)^2}, \quad (6)$$

where the computation of the averages for the other two metrics RC and IS, as well as their sample standard deviations  $s(\text{RC}_b)$  and  $s(\text{IS}_b)$ , respectively, is analogous. This means that the sample standard deviations of the three metrics are also disentangled, since

$$\text{DS} \neq \text{RC} \cdot \text{IS}$$

holds. An alternative to (6) to compute the sample standard deviation would be

$$s(\text{DS}_{b,n}) = \sqrt{\frac{1}{B \cdot N - 1} \sum_{b \in \mathcal{B}} \sum_{n \in \mathcal{N}} (\text{DS} - \text{DS}_{b,n})^2}. \quad (7)$$

However, this comes along with several disadvantages. While (6) compares  $B$  identical sets of routes, (7) would give us a standard deviation of the driving score not only over the (non-)deterministic benchmark runs  $b \in \mathcal{B}$  (desired), but also over the diverse test routes  $n$  (not of interest here!). In consequence, (7) would naturally result in larger standard deviations. Therefore, (6) is used for the calculations, as it allows for a fair comparison of identical sets of routes at a benchmark level, thereby reporting statistical variability of CARLA during our  $B = 3$  benchmark runs. That is what is of interest for us.
